# Supplementary material
Source: publisher figshare collection journal article supplement (https://acs.figshare.com/ndownloader/files/4295800)
Supplement: Supplementary file 1 [file 4295800]

  
  
data_dc4h
  
_audit_creation_method            SHELXL-97 
_chemical_name_systematic 
; 
 ? 
; 
_chemical_name_common             ? 
_chemical_melting_point           ? 
_chemical_formula_moiety         
 'C16 H9 Mn N2 O3'     
_chemical_formula_sum 
 'C16 H9 Mn N2 O3' 
_chemical_formula_weight          332.19 
  
loop_ 
 _atom_type_symbol 
 _atom_type_description 
 _atom_type_scat_dispersion_real 
 _atom_type_scat_dispersion_imag 
 _atom_type_scat_source 
 'C'  'C'   0.0033   0.0016 
 'International Tables Vol C Tables 4.2.6.8 and 6.1.1.4' 
 'H'  'H'   0.0000   0.0000 
 'International Tables Vol C Tables 4.2.6.8 and 6.1.1.4' 
 'N'  'N'   0.0061   0.0033 
 'International Tables Vol C Tables 4.2.6.8 and 6.1.1.4' 
 'O'  'O'   0.0106   0.0060 
 'International Tables Vol C Tables 4.2.6.8 and 6.1.1.4' 
 'Mn'  'Mn'   0.3368   0.7283 
 'International Tables Vol C Tables 4.2.6.8 and 6.1.1.4' 
  
_symmetry_cell_setting            Monoclinic 
_symmetry_space_group_name_H-M    P2(1)/c 
_symmetry_space_group_name_Hall   -P2ybc
loop_ 
 _symmetry_equiv_pos_as_xyz 
 'x, y, z' 
 '-x, y+1/2, -z+1/2' 
 '-x, -y, -z' 
 'x, -y-1/2, z-1/2' 
  
_cell_length_a                    10.1631(14) 
_cell_length_b                    12.7084(16) 
_cell_length_c                    11.9261(19) 
_cell_angle_alpha                 90.00 
_cell_angle_beta                  114.609(15) 
_cell_angle_gamma                 90.00 
_cell_volume                      1400.4(3) 
_cell_formula_units_Z             4 
_cell_measurement_temperature     295(2) 
_cell_measurement_reflns_used     2315 
_cell_measurement_theta_min       2.74   
_cell_measurement_theta_max       28.28  
  
_exptl_crystal_description        prism 
_exptl_crystal_colour             yellow 
_exptl_crystal_size_max           0.2144   
_exptl_crystal_size_mid           0.1307   
_exptl_crystal_size_min           0.0701   
_exptl_crystal_density_meas       ? 
_exptl_crystal_density_diffrn     1.576 
_exptl_crystal_density_method     'not measured' 
_exptl_crystal_F_000              672 
_exptl_absorpt_coefficient_mu     0.956 
_exptl_absorpt_correction_T_min                     0.765
_exptl_absorpt_correction_T_max                     0.876
_exptl_absorpt_correction_type            'analytical'
_exptl_absorpt_process_details
;
CrysAlis RED, Oxford Diffraction Ltd.,
Version 1.171.29.9 (release 23-03-2006 CrysAlis171 .NET)
(compiled Mar 23 2006,23:39:28)
Analytical numeric absorption correction using a multifaceted crystal
model based on expressions derived by R.C. Clark & J.S. Reid.
(Clark, R. C. & Reid, J. S. (1995). Acta Cryst. A51, 887-897)
;  
_exptl_special_details 
; 
 ? 
; 
  
_diffrn_ambient_temperature       295(2) 
_diffrn_radiation_wavelength      0.71073 
_diffrn_radiation_type            MoK\a 
_diffrn_radiation_source          'fine-focus sealed tube' 
_diffrn_radiation_monochromator   graphite 
_diffrn_measurement_device_type   'Xcalibur 3 CCD' 
_diffrn_measurement_method        'omega scans' 
_diffrn_detector_area_resol_mean  ? 
_diffrn_standards_number          0 
_diffrn_standards_interval_count  0 
_diffrn_standards_interval_time   0 
_diffrn_standards_decay_%         0 
_diffrn_reflns_number             4351 
_diffrn_reflns_av_R_equivalents   0.0167 
_diffrn_reflns_av_sigmaI/netI     0.0358 
_diffrn_reflns_limit_h_min        -12 
_diffrn_reflns_limit_h_max        13 
_diffrn_reflns_limit_k_min        -16 
_diffrn_reflns_limit_k_max        5 
_diffrn_reflns_limit_l_min        -15 
_diffrn_reflns_limit_l_max        6 
_diffrn_reflns_theta_min          2.74 
_diffrn_reflns_theta_max          28.28 
_reflns_number_total              3348 
_reflns_number_gt                 2315 
_reflns_threshold_expression      >2sigma(I) 
_diffrn_orient_matrix_UB_11      -0.0194109487
_diffrn_orient_matrix_UB_12       0.0537951862
_diffrn_orient_matrix_UB_13      -0.0013158857
_diffrn_orient_matrix_UB_21      -0.0224887038
_diffrn_orient_matrix_UB_22      -0.0094838004
_diffrn_orient_matrix_UB_23       0.0473823507
_diffrn_orient_matrix_UB_31       0.0716105629
_diffrn_orient_matrix_UB_32       0.0116036046
_diffrn_orient_matrix_UB_33       0.0451767983
_diffrn_measurement_details
;
#__ type_ start__ end____ width___ exp.time_
  1 omega   41.00  111.00   1.0000    7.0000
omega____ theta____ kappa____ phi______ omega'___ theta'___ frames
    -       32.0000 -170.0000   30.0000    0.0000    0.0000 70

#__ type_ start__ end____ width___ exp.time_
  2 omega  -39.00   51.00   1.0000    7.0000
omega____ theta____ kappa____ phi______ omega'___ theta'___ frames
    -       32.0000  -80.0000   30.0000    0.0000    0.0000 90

#__ type_ start__ end____ width___ exp.time_
  3 omega  -29.00   71.00   1.0000    7.0000
omega____ theta____ kappa____ phi______ omega'___ theta'___ frames
    -       32.0000  -90.0000   50.0000    0.0000    0.0000 100

#__ type_ start__ end____ width___ exp.time_
  4 omega  -29.00   -3.00   1.0000    7.0000
omega____ theta____ kappa____ phi______ omega'___ theta'___ frames
    -       32.0000  -10.0000   20.0000    0.0000    0.0000 26

;
_computing_data_collection
;
CrysAlis CCD, Oxford Diffraction Ltd.,
Version 1.171.29.9 (release 23-03-2006 CrysAlis171 .NET)
(compiled Mar 23 2006,23:39:28)
;
_computing_cell_refinement
;
CrysAlis RED, Oxford Diffraction Ltd.,
Version 1.171.29.9 (release 23-03-2006 CrysAlis171 .NET)
(compiled Mar 23 2006,23:39:28)
;
_computing_data_reduction
;
CrysAlis RED, Oxford Diffraction Ltd.,
Version 1.171.29.9 (release 23-03-2006 CrysAlis171 .NET)
(compiled Mar 23 2006,23:39:28)
;
_computing_structure_solution     'SHELXS-97 (Sheldrick, 1990)' 
_computing_structure_refinement   'SHELXL-97 (Sheldrick, 1997)' 
_computing_molecular_graphics     'Bruker SHELXTL' 
_computing_publication_material   'Bruker SHELXTL' 
  
_refine_special_details 
; 
 Refinement of F^2^ against ALL reflections.  The weighted R-factor wR and 
 goodness of fit S are based on F^2^, conventional R-factors R are based 
 on F, with F set to zero for negative F^2^. The threshold expression of 
 F^2^ > 2sigma(F^2^) is used only for calculating R-factors(gt) etc. and is 
 not relevant to the choice of reflections for refinement.  R-factors based 
 on F^2^ are statistically about twice as large as those based on F, and R- 
 factors based on ALL data will be even larger. 
; 
  
_refine_ls_structure_factor_coef  Fsqd 
_refine_ls_matrix_type            full 
_refine_ls_weighting_scheme       calc 
_refine_ls_weighting_details 
 'calc w=1/[\s^2^(Fo^2^)+(0.0350P)^2^+0.0000P] where P=(Fo^2^+2Fc^2^)/3' 
_atom_sites_solution_primary      direct 
_atom_sites_solution_secondary    difmap 
_atom_sites_solution_hydrogens    geom 
_refine_ls_hydrogen_treatment     constr 
_refine_ls_extinction_method      none 
_refine_ls_extinction_coef        ? 
_refine_ls_number_reflns          3348 
_refine_ls_number_parameters      199 
_refine_ls_number_restraints      0 
_refine_ls_R_factor_all           0.0520 
_refine_ls_R_factor_gt            0.0298 
_refine_ls_wR_factor_ref          0.0697 
_refine_ls_wR_factor_gt           0.0662 
_refine_ls_goodness_of_fit_ref    1.001 
_refine_ls_restrained_S_all       1.001 
_refine_ls_shift/su_max           0.000 
_refine_ls_shift/su_mean          0.000 
  
loop_ 
 _atom_site_label 
 _atom_site_type_symbol 
 _atom_site_fract_x 
 _atom_site_fract_y 
 _atom_site_fract_z 
 _atom_site_U_iso_or_equiv 
 _atom_site_adp_type 
 _atom_site_occupancy 
 _atom_site_symmetry_multiplicity 
 _atom_site_calc_flag 
 _atom_site_refinement_flags 
 _atom_site_disorder_assembly 
 _atom_site_disorder_group 
Mn1 Mn 0.89740(3) 0.14574(2) 0.18350(2) 0.03361(9) Uani 1 1 d . . . 
N1 N 0.53710(15) 0.18640(12) -0.11173(13) 0.0367(3) Uani 1 1 d . . . 
C1 C 0.90550(18) 0.11535(15) 0.04016(17) 0.0411(4) Uani 1 1 d . . . 
O1 O 0.90828(16) 0.09730(13) -0.05327(12) 0.0627(4) Uani 1 1 d . . . 
C2 C 0.59389(16) 0.24672(13) -0.01305(15) 0.0336(4) Uani 1 1 d . . . 
O2 O 1.13896(16) 0.00549(14) 0.32482(14) 0.0707(5) Uani 1 1 d . . . 
C3 C 0.57323(19) 0.35772(14) -0.02063(16) 0.0392(4) Uani 1 1 d . . . 
H3A H 0.6176 0.3972 0.0511 0.047 Uiso 1 1 calc R . . 
O3 O 1.09753(19) 0.32299(13) 0.22935(18) 0.0803(5) Uani 1 1 d . . . 
C4 C 1.0187(2) 0.25374(17) 0.21069(18) 0.0484(5) Uani 1 1 d . . . 
N4 N 0.49518(16) 0.40717(12) -0.12298(13) 0.0430(4) Uani 1 1 d . . . 
C5 C 0.43326(18) 0.34580(15) -0.22666(16) 0.0383(4) Uani 1 1 d . . . 
C6 C 0.3464(2) 0.39366(18) -0.33927(16) 0.0510(5) Uani 1 1 d . . . 
H6A H 0.3313 0.4660 -0.3432 0.061 Uiso 1 1 calc R . . 
C7 C 0.2841(2) 0.33353(19) -0.44311(19) 0.0565(6) Uani 1 1 d . . . 
H7A H 0.2255 0.3650 -0.5177 0.068 Uiso 1 1 calc R . . 
C8 C 0.3081(2) 0.2244(2) -0.43799(17) 0.0528(5) Uani 1 1 d . . . 
H8A H 0.2654 0.1846 -0.5096 0.063 Uiso 1 1 calc R . . 
C9 C 0.39281(19) 0.17608(16) -0.33004(17) 0.0454(5) Uani 1 1 d . . . 
H9A H 0.4091 0.1040 -0.3283 0.054 Uiso 1 1 calc R . . 
C10 C 0.45583(16) 0.23595(14) -0.22068(15) 0.0352(4) Uani 1 1 d . . . 
C11 C 0.67436(17) 0.19473(14) 0.10626(16) 0.0356(4) Uani 1 1 d . . . 
C12 C 0.75015(18) 0.24350(15) 0.22338(15) 0.0403(4) Uani 1 1 d . . . 
H12A H 0.7602 0.3194 0.2390 0.048 Uiso 1 1 calc R . . 
C13 C 0.8045(2) 0.16382(16) 0.31327(18) 0.0482(5) Uani 1 1 d . . . 
H13A H 0.8580 0.1748 0.4022 0.058 Uiso 1 1 calc R . . 
C14 C 0.7623(2) 0.06571(17) 0.25358(18) 0.0495(5) Uani 1 1 d . . . 
H14A H 0.7823 -0.0032 0.2942 0.059 Uiso 1 1 calc R . . 
C15 C 0.68336(18) 0.08343(15) 0.12652(17) 0.0422(4) Uani 1 1 d . . . 
H15A H 0.6387 0.0293 0.0635 0.051 Uiso 1 1 calc R . . 
C16 C 1.0453(2) 0.05972(16) 0.26871(17) 0.0446(4) Uani 1 1 d . . . 
  
loop_ 
 _atom_site_aniso_label 
 _atom_site_aniso_U_11 
 _atom_site_aniso_U_22 
 _atom_site_aniso_U_33 
 _atom_site_aniso_U_23 
 _atom_site_aniso_U_13 
 _atom_site_aniso_U_12 
Mn1 0.03058(14) 0.03064(14) 0.03851(14) 0.00001(12) 0.01330(10) 0.00165(12) 
N1 0.0321(7) 0.0329(8) 0.0464(8) -0.0042(6) 0.0176(6) -0.0014(6) 
C1 0.0330(9) 0.0409(11) 0.0453(10) 0.0035(8) 0.0121(8) 0.0045(8) 
O1 0.0683(10) 0.0765(11) 0.0431(8) -0.0021(7) 0.0232(7) 0.0122(9) 
C2 0.0256(8) 0.0332(9) 0.0429(9) -0.0009(7) 0.0150(7) 0.0007(7) 
O2 0.0500(8) 0.0643(11) 0.0792(11) 0.0125(8) 0.0083(8) 0.0198(8) 
C3 0.0394(10) 0.0346(10) 0.0409(9) -0.0053(8) 0.0140(8) -0.0020(8) 
O3 0.0687(11) 0.0535(11) 0.1269(16) -0.0157(10) 0.0490(10) -0.0231(9) 
C4 0.0420(10) 0.0437(12) 0.0626(13) -0.0045(9) 0.0250(9) 0.0024(10) 
N4 0.0452(9) 0.0351(9) 0.0443(8) -0.0012(7) 0.0143(7) 0.0016(7) 
C5 0.0329(9) 0.0396(10) 0.0422(9) -0.0018(8) 0.0155(7) 0.0002(8) 
C6 0.0490(11) 0.0508(12) 0.0470(11) 0.0052(9) 0.0138(9) 0.0075(10) 
C7 0.0429(12) 0.0731(18) 0.0433(11) 0.0055(10) 0.0079(9) 0.0027(10) 
C8 0.0426(11) 0.0700(16) 0.0423(11) -0.0125(10) 0.0142(9) -0.0133(11) 
C9 0.0399(10) 0.0463(11) 0.0517(11) -0.0112(9) 0.0208(9) -0.0091(9) 
C10 0.0267(8) 0.0375(10) 0.0424(9) -0.0044(7) 0.0155(7) -0.0037(7) 
C11 0.0293(8) 0.0347(10) 0.0451(10) -0.0016(8) 0.0178(7) 0.0020(8) 
C12 0.0415(10) 0.0403(11) 0.0430(10) -0.0014(8) 0.0213(8) 0.0075(8) 
C13 0.0512(11) 0.0575(14) 0.0412(10) 0.0073(9) 0.0245(9) 0.0112(10) 
C14 0.0462(11) 0.0479(12) 0.0639(12) 0.0181(10) 0.0323(10) 0.0063(10) 
C15 0.0317(9) 0.0361(11) 0.0607(12) 0.0023(8) 0.0209(8) 0.0001(8) 
C16 0.0411(10) 0.0415(11) 0.0493(11) -0.0017(9) 0.0169(9) 0.0010(9) 
  
_geom_special_details 
; 
 All esds (except the esd in the dihedral angle between two l.s. planes) 
 are estimated using the full covariance matrix.  The cell esds are taken 
 into account individually in the estimation of esds in distances, angles 
 and torsion angles; correlations between esds in cell parameters are only 
 used when they are defined by crystal symmetry.  An approximate (isotropic) 
 treatment of cell esds is used for estimating esds involving l.s. planes. 
; 
  
loop_ 
 _geom_bond_atom_site_label_1 
 _geom_bond_atom_site_label_2 
 _geom_bond_distance 
 _geom_bond_site_symmetry_2 
 _geom_bond_publ_flag 
Mn1 C4 1.782(2) . ? 
Mn1 C1 1.7877(19) . ? 
Mn1 C16 1.793(2) . ? 
Mn1 C13 2.1348(19) . ? 
Mn1 C14 2.1387(18) . ? 
Mn1 C15 2.1423(17) . ? 
Mn1 C12 2.1452(17) . ? 
Mn1 C11 2.1530(17) . ? 
N1 C2 1.319(2) . ? 
N1 C10 1.369(2) . ? 
C1 O1 1.149(2) . ? 
C2 C3 1.424(2) . ? 
C2 C11 1.470(2) . ? 
O2 C16 1.140(2) . ? 
C3 N4 1.307(2) . ? 
C3 H3A 0.9300 . ? 
O3 C4 1.148(2) . ? 
N4 C5 1.373(2) . ? 
C5 C6 1.402(2) . ? 
C5 C10 1.412(3) . ? 
C6 C7 1.366(3) . ? 
C6 H6A 0.9300 . ? 
C7 C8 1.404(3) . ? 
C7 H7A 0.9300 . ? 
C8 C9 1.361(3) . ? 
C8 H8A 0.9300 . ? 
C9 C10 1.412(2) . ? 
C9 H9A 0.9300 . ? 
C11 C12 1.426(2) . ? 
C11 C15 1.431(3) . ? 
C12 C13 1.410(3) . ? 
C12 H12A 0.9800 . ? 
C13 C14 1.411(3) . ? 
C13 H13A 0.9800 . ? 
C14 C15 1.407(3) . ? 
C14 H14A 0.9800 . ? 
C15 H15A 0.9800 . ? 
  
loop_ 
 _geom_angle_atom_site_label_1 
 _geom_angle_atom_site_label_2 
 _geom_angle_atom_site_label_3 
 _geom_angle 
 _geom_angle_site_symmetry_1 
 _geom_angle_site_symmetry_3 
 _geom_angle_publ_flag 
C4 Mn1 C1 92.09(9) . . ? 
C4 Mn1 C16 90.77(9) . . ? 
C1 Mn1 C16 92.80(8) . . ? 
C4 Mn1 C13 105.46(9) . . ? 
C1 Mn1 C13 157.97(8) . . ? 
C16 Mn1 C13 100.03(8) . . ? 
C4 Mn1 C14 143.44(9) . . ? 
C1 Mn1 C14 124.31(9) . . ? 
C16 Mn1 C14 90.67(8) . . ? 
C13 Mn1 C14 38.56(8) . . ? 
C4 Mn1 C15 151.22(8) . . ? 
C1 Mn1 C15 93.54(8) . . ? 
C16 Mn1 C15 117.08(8) . . ? 
C13 Mn1 C15 64.69(8) . . ? 
C14 Mn1 C15 38.36(7) . . ? 
C4 Mn1 C12 90.41(8) . . ? 
C1 Mn1 C12 130.64(7) . . ? 
C16 Mn1 C12 136.47(8) . . ? 
C13 Mn1 C12 38.45(7) . . ? 
C14 Mn1 C12 64.41(8) . . ? 
C15 Mn1 C12 64.82(7) . . ? 
C4 Mn1 C11 112.36(8) . . ? 
C1 Mn1 C11 96.48(7) . . ? 
C16 Mn1 C11 154.63(8) . . ? 
C13 Mn1 C11 64.80(7) . . ? 
C14 Mn1 C11 64.65(7) . . ? 
C15 Mn1 C11 38.93(7) . . ? 
C12 Mn1 C11 38.74(6) . . ? 
C2 N1 C10 116.52(15) . . ? 
O1 C1 Mn1 178.52(17) . . ? 
N1 C2 C3 121.40(15) . . ? 
N1 C2 C11 117.56(15) . . ? 
C3 C2 C11 120.98(15) . . ? 
N4 C3 C2 123.50(16) . . ? 
N4 C3 H3A 118.3 . . ? 
C2 C3 H3A 118.3 . . ? 
O3 C4 Mn1 179.3(2) . . ? 
C3 N4 C5 116.13(16) . . ? 
N4 C5 C6 119.07(18) . . ? 
N4 C5 C10 120.82(16) . . ? 
C6 C5 C10 120.12(17) . . ? 
C7 C6 C5 119.7(2) . . ? 
C7 C6 H6A 120.2 . . ? 
C5 C6 H6A 120.2 . . ? 
C6 C7 C8 120.42(19) . . ? 
C6 C7 H7A 119.8 . . ? 
C8 C7 H7A 119.8 . . ? 
C9 C8 C7 121.11(19) . . ? 
C9 C8 H8A 119.4 . . ? 
C7 C8 H8A 119.4 . . ? 
C8 C9 C10 119.7(2) . . ? 
C8 C9 H9A 120.2 . . ? 
C10 C9 H9A 120.2 . . ? 
N1 C10 C5 121.61(15) . . ? 
N1 C10 C9 119.42(17) . . ? 
C5 C10 C9 118.98(16) . . ? 
C12 C11 C15 107.08(16) . . ? 
C12 C11 C2 127.50(16) . . ? 
C15 C11 C2 125.33(16) . . ? 
C12 C11 Mn1 70.34(9) . . ? 
C15 C11 Mn1 70.13(10) . . ? 
C2 C11 Mn1 127.33(11) . . ? 
C13 C12 C11 108.27(17) . . ? 
C13 C12 Mn1 70.37(11) . . ? 
C11 C12 Mn1 70.92(10) . . ? 
C13 C12 H12A 125.9 . . ? 
C11 C12 H12A 125.9 . . ? 
Mn1 C12 H12A 125.9 . . ? 
C12 C13 C14 108.10(17) . . ? 
C12 C13 Mn1 71.17(10) . . ? 
C14 C13 Mn1 70.87(11) . . ? 
C12 C13 H13A 125.9 . . ? 
C14 C13 H13A 125.9 . . ? 
Mn1 C13 H13A 125.9 . . ? 
C15 C14 C13 108.62(17) . . ? 
C15 C14 Mn1 70.96(10) . . ? 
C13 C14 Mn1 70.57(11) . . ? 
C15 C14 H14A 125.7 . . ? 
C13 C14 H14A 125.7 . . ? 
Mn1 C14 H14A 125.7 . . ? 
C14 C15 C11 107.93(17) . . ? 
C14 C15 Mn1 70.68(10) . . ? 
C11 C15 Mn1 70.94(10) . . ? 
C14 C15 H15A 126.0 . . ? 
C11 C15 H15A 126.0 . . ? 
Mn1 C15 H15A 126.0 . . ? 
O2 C16 Mn1 178.73(18) . . ? 
  
_diffrn_measured_fraction_theta_max    0.964 
_diffrn_reflns_theta_full              26.50 
_diffrn_measured_fraction_theta_full   0.972 
_refine_diff_density_max    0.340 
_refine_diff_density_min   -0.265 
_refine_diff_density_rms    0.047 
  
  
data_dc5 
  
_audit_creation_method            SHELXL-97 
_chemical_name_systematic 
; 
 ? 
; 
_chemical_name_common             ? 
_chemical_melting_point           ? 
_chemical_formula_moiety    
 'C25 H20 Mn N3 O3'         
_chemical_formula_sum 
 'C25 H20 Mn N3 O3' 
_chemical_formula_weight          465.38 
  
loop_ 
 _atom_type_symbol 
 _atom_type_description 
 _atom_type_scat_dispersion_real 
 _atom_type_scat_dispersion_imag 
 _atom_type_scat_source 
 'C'  'C'   0.0033   0.0016 
 'International Tables Vol C Tables 4.2.6.8 and 6.1.1.4' 
 'H'  'H'   0.0000   0.0000 
 'International Tables Vol C Tables 4.2.6.8 and 6.1.1.4' 
 'N'  'N'   0.0061   0.0033 
 'International Tables Vol C Tables 4.2.6.8 and 6.1.1.4' 
 'O'  'O'   0.0106   0.0060 
 'International Tables Vol C Tables 4.2.6.8 and 6.1.1.4' 
 'Mn'  'Mn'   0.3368   0.7283 
 'International Tables Vol C Tables 4.2.6.8 and 6.1.1.4' 
  
_symmetry_cell_setting            Monoclinic 
_symmetry_space_group_name_H-M    P2(1)/c 
_symmetry_space_group_name_Hall   -P2ybc
loop_ 
 _symmetry_equiv_pos_as_xyz 
 'x, y, z' 
 '-x, y+1/2, -z+1/2' 
 '-x, -y, -z' 
 'x, -y-1/2, z-1/2' 
  
_cell_length_a                    17.2740(13) 
_cell_length_b                    10.3238(8) 
_cell_length_c                    12.4326(6) 
_cell_angle_alpha                 90.00 
_cell_angle_beta                  101.833(5) 
_cell_angle_gamma                 90.00 
_cell_volume                      2170.0(3) 
_cell_formula_units_Z             4 
_cell_measurement_temperature     120(2) 
_cell_measurement_reflns_used     4320 
_cell_measurement_theta_min       2.71      
_cell_measurement_theta_max       30.54     
  
_exptl_crystal_description        prism 
_exptl_crystal_colour             yellow
_exptl_crystal_size_max           0.2621 
_exptl_crystal_size_mid           0.1335 
_exptl_crystal_size_min           0.0705 
_exptl_crystal_density_meas       ? 
_exptl_crystal_density_diffrn     1.424 
_exptl_crystal_density_method     'not measured' 
_exptl_crystal_F_000              960 
_exptl_absorpt_coefficient_mu     0.641 
_exptl_absorpt_correction_T_min                     0.781
_exptl_absorpt_correction_T_max                     0.913
_exptl_absorpt_correction_type            'analytical'
_exptl_absorpt_process_details
;
CrysAlis RED, Oxford Diffraction Ltd.,
Version 1.171.29.9 (release 23-03-2006 CrysAlis171 .NET)
(compiled Mar 23 2006,23:39:28)
Analytical numeric absorption correction using a multifaceted crystal
model based on expressions derived by R.C. Clark & J.S. Reid.
(Clark, R. C. & Reid, J. S. (1995). Acta Cryst. A51, 887-897)
;

_exptl_special_details 
; 
 ? 
; 
  
_diffrn_ambient_temperature       120(2) 
_diffrn_radiation_wavelength      0.71073 
_diffrn_radiation_type            MoK\a 
_diffrn_radiation_source          'fine-focus sealed tube' 
_diffrn_radiation_monochromator   graphite 
_diffrn_measurement_device_type   'Xcalibur 3 CCD' 
_diffrn_measurement_method        'phi and omega scans' 
_diffrn_detector_area_resol_mean  ? 
_diffrn_standards_number          0 
_diffrn_standards_interval_count  0 
_diffrn_standards_interval_time   0 
_diffrn_standards_decay_%         0 
_diffrn_reflns_number             13685 
_diffrn_reflns_av_R_equivalents   0.0259 
_diffrn_reflns_av_sigmaI/netI     0.0588 
_diffrn_reflns_limit_h_min        -22 
_diffrn_reflns_limit_h_max        24 
_diffrn_reflns_limit_k_min        -14 
_diffrn_reflns_limit_k_max        12 
_diffrn_reflns_limit_l_min        -10 
_diffrn_reflns_limit_l_max        17 
_diffrn_reflns_theta_min          2.71 
_diffrn_reflns_theta_max          30.54 
_reflns_number_total              6475 
_reflns_number_gt                 4320 
_reflns_threshold_expression      >2sigma(I) 
_computing_data_collection
;
CrysAlis CCD, Oxford Diffraction Ltd.,
Version 1.171.29.9 (release 23-03-2006 CrysAlis171 .NET)
(compiled Mar 23 2006,23:39:28)
;
_computing_cell_refinement
;
CrysAlis RED, Oxford Diffraction Ltd.,
Version 1.171.29.9 (release 23-03-2006 CrysAlis171 .NET)
(compiled Mar 23 2006,23:39:28)
;
_computing_data_reduction
;
CrysAlis RED, Oxford Diffraction Ltd.,
Version 1.171.29.9 (release 23-03-2006 CrysAlis171 .NET)
(compiled Mar 23 2006,23:39:28)
;
  
_computing_structure_solution     'SHELXS-97 (Sheldrick, 1990)' 
_computing_structure_refinement   'SHELXL-97 (Sheldrick, 1997)' 
_computing_molecular_graphics     'Bruker SHELXTL' 
_computing_publication_material   'Bruker SHELXTL' 
  
_refine_special_details 
; 
 Refinement of F^2^ against ALL reflections.  The weighted R-factor wR and 
 goodness of fit S are based on F^2^, conventional R-factors R are based 
 on F, with F set to zero for negative F^2^. The threshold expression of 
 F^2^ > 2sigma(F^2^) is used only for calculating R-factors(gt) etc. and is 
 not relevant to the choice of reflections for refinement.  R-factors based 
 on F^2^ are statistically about twice as large as those based on F, and R- 
 factors based on ALL data will be even larger. 
; 
  
_refine_ls_structure_factor_coef  Fsqd 
_refine_ls_matrix_type            full 
_refine_ls_weighting_scheme       calc 
_refine_ls_weighting_details 
 'calc w=1/[\s^2^(Fo^2^)+(0.0328P)^2^+0.0000P] where P=(Fo^2^+2Fc^2^)/3' 
_atom_sites_solution_primary      direct 
_atom_sites_solution_secondary    difmap 
_atom_sites_solution_hydrogens    geom 
_refine_ls_hydrogen_treatment     constr 
_refine_ls_extinction_method      none 
_refine_ls_extinction_coef        ? 
_refine_ls_number_reflns          6475 
_refine_ls_number_parameters      289 
_refine_ls_number_restraints      0 
_refine_ls_R_factor_all           0.0620 
_refine_ls_R_factor_gt            0.0337 
_refine_ls_wR_factor_ref          0.0749 
_refine_ls_wR_factor_gt           0.0710 
_refine_ls_goodness_of_fit_ref    1.000 
_refine_ls_restrained_S_all       1.000 
_refine_ls_shift/su_max           0.000 
_refine_ls_shift/su_mean          0.000 
  
loop_ 
 _atom_site_label 
 _atom_site_type_symbol 
 _atom_site_fract_x 
 _atom_site_fract_y 
 _atom_site_fract_z 
 _atom_site_U_iso_or_equiv 
 _atom_site_adp_type 
 _atom_site_occupancy 
 _atom_site_symmetry_multiplicity 
 _atom_site_calc_flag 
 _atom_site_refinement_flags 
 _atom_site_disorder_assembly 
 _atom_site_disorder_group 
Mn1 Mn 0.086221(12) 0.21522(2) 0.387354(17) 0.01450(6) Uani 1 1 d . . . 
O1 O -0.08744(6) 0.20600(12) 0.33382(10) 0.0345(3) Uani 1 1 d . . . 
N2 N 0.31203(7) 0.20674(11) 0.68450(9) 0.0160(2) Uani 1 1 d . . . 
O2 O 0.07683(7) 0.40301(12) 0.56193(9) 0.0347(3) Uani 1 1 d . . . 
N3 N 0.34723(7) 0.14843(11) 0.51857(9) 0.0134(2) Uani 1 1 d . . . 
C6 C 0.28161(8) 0.22798(13) 0.45852(10) 0.0125(3) Uani 1 1 d . . . 
H6A H 0.2958 0.2601 0.3910 0.015 Uiso 1 1 calc R . . 
C7 C 0.27520(8) 0.34249(14) 0.53286(11) 0.0140(3) Uani 1 1 d . . . 
C19 C 0.41760(9) -0.21125(15) 0.69458(13) 0.0241(3) Uani 1 1 d . . . 
H19A H 0.4099 -0.2934 0.6635 0.029 Uiso 1 1 calc R . . 
C15 C 0.39076(8) 0.01715(14) 0.68489(11) 0.0149(3) Uani 1 1 d . . . 
C8 C 0.25738(8) 0.47441(14) 0.48807(11) 0.0146(3) Uani 1 1 d . . . 
N1 N 0.28743(7) 0.32719(11) 0.63771(9) 0.0161(3) Uani 1 1 d . . . 
O3 O 0.08340(7) 0.41413(11) 0.21778(10) 0.0338(3) Uani 1 1 d . . . 
C21 C 0.41101(8) 0.11228(14) 0.46338(11) 0.0164(3) Uani 1 1 d . . . 
H21A H 0.4530 0.0718 0.5165 0.020 Uiso 1 1 calc R . . 
H21B H 0.4324 0.1903 0.4372 0.020 Uiso 1 1 calc R . . 
C25 C -0.01963(9) 0.20798(15) 0.35425(12) 0.0207(3) Uani 1 1 d . . . 
C17 C 0.47551(9) -0.07397(16) 0.84482(12) 0.0242(4) Uani 1 1 d . . . 
H17A H 0.5078 -0.0635 0.9140 0.029 Uiso 1 1 calc R . . 
C22 C 0.38586(9) 0.02067(15) 0.36721(11) 0.0227(3) Uani 1 1 d . . . 
H22A H 0.4305 0.0012 0.3351 0.034 Uiso 1 1 calc R . . 
H22B H 0.3453 0.0608 0.3131 0.034 Uiso 1 1 calc R . . 
H22C H 0.3658 -0.0579 0.3925 0.034 Uiso 1 1 calc R . . 
C13 C 0.26164(9) 0.50511(14) 0.38006(12) 0.0182(3) Uani 1 1 d . . . 
H13A H 0.2748 0.4414 0.3340 0.022 Uiso 1 1 calc R . . 
C11 C 0.22519(9) 0.72552(15) 0.40709(13) 0.0238(3) Uani 1 1 d . . . 
H11A H 0.2147 0.8091 0.3802 0.029 Uiso 1 1 calc R . . 
C24 C 0.08503(9) 0.33803(15) 0.28606(13) 0.0211(3) Uani 1 1 d . . . 
C20 C 0.38137(9) -0.10536(14) 0.63802(12) 0.0192(3) Uani 1 1 d . . . 
H20A H 0.3504 -0.1161 0.5680 0.023 Uiso 1 1 calc R . . 
C1 C 0.17132(8) 0.10801(13) 0.31971(12) 0.0156(3) Uani 1 1 d . . . 
H1A H 0.1899 0.1304 0.2527 0.019 Uiso 1 1 calc R . . 
C16 C 0.43776(8) 0.03210(15) 0.78949(11) 0.0189(3) Uani 1 1 d . . . 
H16A H 0.4438 0.1135 0.8222 0.023 Uiso 1 1 calc R . . 
C9 C 0.23625(9) 0.57199(14) 0.55471(12) 0.0202(3) Uani 1 1 d . . . 
H9A H 0.2333 0.5535 0.6270 0.024 Uiso 1 1 calc R . . 
C23 C 0.08121(9) 0.33079(16) 0.49320(12) 0.0216(3) Uani 1 1 d . . . 
C12 C 0.24626(9) 0.63050(15) 0.34131(13) 0.0231(3) Uani 1 1 d . . . 
H12A H 0.2503 0.6505 0.2697 0.028 Uiso 1 1 calc R . . 
C14 C 0.34856(8) 0.13057(14) 0.62712(11) 0.0144(3) Uani 1 1 d . . . 
C5 C 0.20659(8) 0.14984(13) 0.42824(11) 0.0134(3) Uani 1 1 d . . . 
C18 C 0.46540(10) -0.19543(16) 0.79751(13) 0.0261(4) Uani 1 1 d . . . 
H18A H 0.4907 -0.2667 0.8349 0.031 Uiso 1 1 calc R . . 
C3 C 0.10118(9) 0.01649(14) 0.43753(12) 0.0212(3) Uani 1 1 d . . . 
H3A H 0.0629 -0.0363 0.4664 0.025 Uiso 1 1 calc R . . 
C10 C 0.21979(9) 0.69564(14) 0.51386(13) 0.0234(3) Uani 1 1 d . . . 
H10A H 0.2049 0.7594 0.5585 0.028 Uiso 1 1 calc R . . 
C4 C 0.16239(9) 0.09157(14) 0.50043(12) 0.0184(3) Uani 1 1 d . . . 
H4A H 0.1737 0.1000 0.5806 0.022 Uiso 1 1 calc R . . 
C2 C 0.10640(9) 0.02781(14) 0.32495(12) 0.0193(3) Uani 1 1 d . . . 
H2A H 0.0725 -0.0161 0.2628 0.023 Uiso 1 1 calc R . . 
  
loop_ 
 _atom_site_aniso_label 
 _atom_site_aniso_U_11 
 _atom_site_aniso_U_22 
 _atom_site_aniso_U_33 
 _atom_site_aniso_U_23 
 _atom_site_aniso_U_13 
 _atom_site_aniso_U_12 
Mn1 0.01204(10) 0.01711(11) 0.01442(11) 0.00071(9) 0.00288(7) 0.00165(9) 
O1 0.0147(5) 0.0406(7) 0.0471(7) -0.0055(6) 0.0034(5) -0.0003(5) 
N2 0.0179(6) 0.0173(6) 0.0129(5) 0.0009(5) 0.0032(4) 0.0030(5) 
O2 0.0318(7) 0.0425(8) 0.0285(6) -0.0138(6) 0.0029(5) 0.0079(6) 
N3 0.0124(5) 0.0153(6) 0.0129(5) 0.0014(5) 0.0033(4) 0.0048(5) 
C6 0.0137(6) 0.0132(7) 0.0110(6) 0.0020(5) 0.0031(5) 0.0038(6) 
C7 0.0114(6) 0.0158(7) 0.0151(7) -0.0009(5) 0.0038(5) 0.0000(6) 
C19 0.0272(8) 0.0161(7) 0.0290(8) 0.0018(7) 0.0055(6) 0.0013(7) 
C15 0.0131(6) 0.0181(7) 0.0147(7) 0.0038(6) 0.0053(5) 0.0010(6) 
C8 0.0106(6) 0.0158(7) 0.0171(7) -0.0002(6) 0.0017(5) 0.0014(6) 
N1 0.0169(6) 0.0165(6) 0.0153(6) 0.0006(5) 0.0043(5) 0.0030(5) 
O3 0.0360(7) 0.0330(7) 0.0358(7) 0.0171(6) 0.0156(6) 0.0126(6) 
C21 0.0137(6) 0.0198(7) 0.0167(7) 0.0032(6) 0.0055(5) 0.0046(6) 
C25 0.0200(7) 0.0216(8) 0.0212(7) -0.0016(6) 0.0054(6) 0.0008(7) 
C17 0.0233(8) 0.0310(9) 0.0168(7) 0.0041(6) 0.0002(6) 0.0053(7) 
C22 0.0244(8) 0.0278(8) 0.0161(7) -0.0009(6) 0.0047(6) 0.0086(7) 
C13 0.0197(7) 0.0179(7) 0.0174(7) 0.0001(6) 0.0051(6) 0.0043(6) 
C11 0.0230(8) 0.0156(8) 0.0318(8) 0.0033(7) 0.0033(7) 0.0034(7) 
C24 0.0164(7) 0.0231(8) 0.0249(8) -0.0001(7) 0.0066(6) 0.0053(6) 
C20 0.0190(7) 0.0213(8) 0.0167(7) 0.0020(6) 0.0021(6) 0.0002(6) 
C1 0.0152(7) 0.0148(7) 0.0169(7) -0.0015(5) 0.0035(5) 0.0026(6) 
C16 0.0186(7) 0.0219(8) 0.0161(7) 0.0007(6) 0.0031(6) 0.0020(6) 
C9 0.0232(8) 0.0195(8) 0.0184(7) -0.0022(6) 0.0057(6) 0.0025(6) 
C23 0.0164(7) 0.0263(8) 0.0209(8) 0.0004(7) 0.0010(6) 0.0041(6) 
C12 0.0261(8) 0.0237(8) 0.0203(7) 0.0067(6) 0.0067(6) 0.0036(7) 
C14 0.0122(6) 0.0168(7) 0.0136(6) 0.0000(5) 0.0014(5) -0.0001(6) 
C5 0.0129(6) 0.0130(7) 0.0144(6) 0.0004(5) 0.0027(5) 0.0037(5) 
C18 0.0266(8) 0.0256(9) 0.0256(8) 0.0112(7) 0.0046(7) 0.0089(7) 
C3 0.0187(7) 0.0173(8) 0.0283(8) 0.0079(6) 0.0064(6) 0.0013(6) 
C10 0.0269(8) 0.0167(8) 0.0271(8) -0.0049(6) 0.0065(7) 0.0029(7) 
C4 0.0163(7) 0.0210(8) 0.0184(7) 0.0046(6) 0.0046(6) 0.0038(6) 
C2 0.0175(7) 0.0149(7) 0.0247(8) -0.0031(6) 0.0024(6) 0.0007(6) 
  
_geom_special_details 
; 
 All esds (except the esd in the dihedral angle between two l.s. planes) 
 are estimated using the full covariance matrix.  The cell esds are taken 
 into account individually in the estimation of esds in distances, angles 
 and torsion angles; correlations between esds in cell parameters are only 
 used when they are defined by crystal symmetry.  An approximate (isotropic) 
 treatment of cell esds is used for estimating esds involving l.s. planes. 
; 
  
loop_ 
 _geom_bond_atom_site_label_1 
 _geom_bond_atom_site_label_2 
 _geom_bond_distance 
 _geom_bond_site_symmetry_2 
 _geom_bond_publ_flag 
Mn1 C24 1.7841(16) . ? 
Mn1 C25 1.7915(15) . ? 
Mn1 C23 1.7914(16) . ? 
Mn1 C2 2.1396(15) . ? 
Mn1 C5 2.1456(13) . ? 
Mn1 C4 2.1398(14) . ? 
Mn1 C3 2.1446(15) . ? 
Mn1 C1 2.1448(15) . ? 
O1 C25 1.1468(18) . ? 
N2 C14 1.3077(18) . ? 
N2 N1 1.4014(16) . ? 
O2 C23 1.1481(18) . ? 
N3 C14 1.3577(17) . ? 
N3 C21 1.4607(18) . ? 
N3 C6 1.4729(16) . ? 
C6 C5 1.5073(19) . ? 
C6 C7 1.5186(19) . ? 
C6 H6A 0.9800 . ? 
C7 N1 1.2868(17) . ? 
C7 C8 1.4797(19) . ? 
C19 C18 1.383(2) . ? 
C19 C20 1.379(2) . ? 
C19 H19A 0.9300 . ? 
C15 C16 1.3932(19) . ? 
C15 C20 1.388(2) . ? 
C15 C14 1.4844(19) . ? 
C8 C13 1.396(2) . ? 
C8 C9 1.400(2) . ? 
O3 C24 1.1529(19) . ? 
C21 C22 1.517(2) . ? 
C21 H21A 0.9700 . ? 
C21 H21B 0.9700 . ? 
C17 C18 1.381(2) . ? 
C17 C16 1.383(2) . ? 
C17 H17A 0.9300 . ? 
C22 H22A 0.9600 . ? 
C22 H22B 0.9600 . ? 
C22 H22C 0.9600 . ? 
C13 C12 1.388(2) . ? 
C13 H13A 0.9300 . ? 
C11 C12 1.373(2) . ? 
C11 C10 1.385(2) . ? 
C11 H11A 0.9300 . ? 
C20 H20A 0.9300 . ? 
C1 C2 1.406(2) . ? 
C1 C5 1.4287(19) . ? 
C1 H1A 0.9800 . ? 
C16 H16A 0.9300 . ? 
C9 C10 1.382(2) . ? 
C9 H9A 0.9300 . ? 
C12 H12A 0.9300 . ? 
C5 C4 1.425(2) . ? 
C18 H18A 0.9300 . ? 
C3 C4 1.411(2) . ? 
C3 C2 1.426(2) . ? 
C3 H3A 0.9800 . ? 
C10 H10A 0.9300 . ? 
C4 H4A 0.9800 . ? 
C2 H2A 0.9800 . ? 
  
loop_ 
 _geom_angle_atom_site_label_1 
 _geom_angle_atom_site_label_2 
 _geom_angle_atom_site_label_3 
 _geom_angle 
 _geom_angle_site_symmetry_1 
 _geom_angle_site_symmetry_3 
 _geom_angle_publ_flag 
C24 Mn1 C25 90.23(7) . . ? 
C24 Mn1 C23 92.86(7) . . ? 
C25 Mn1 C23 89.76(7) . . ? 
C24 Mn1 C2 111.46(6) . . ? 
C25 Mn1 C2 96.51(6) . . ? 
C23 Mn1 C2 154.77(6) . . ? 
C24 Mn1 C5 105.14(6) . . ? 
C25 Mn1 C5 159.24(6) . . ? 
C23 Mn1 C5 103.06(6) . . ? 
C2 Mn1 C5 65.13(5) . . ? 
C24 Mn1 C4 143.54(6) . . ? 
C25 Mn1 C4 125.96(6) . . ? 
C23 Mn1 C4 91.75(6) . . ? 
C2 Mn1 C4 64.83(6) . . ? 
C5 Mn1 C4 38.85(5) . . ? 
C24 Mn1 C3 150.28(7) . . ? 
C25 Mn1 C3 94.78(7) . . ? 
C23 Mn1 C3 116.39(7) . . ? 
C2 Mn1 C3 38.88(6) . . ? 
C5 Mn1 C3 64.98(6) . . ? 
C4 Mn1 C3 38.46(5) . . ? 
C24 Mn1 C1 89.98(6) . . ? 
C25 Mn1 C1 129.62(6) . . ? 
C23 Mn1 C1 140.53(6) . . ? 
C2 Mn1 C1 38.32(5) . . ? 
C5 Mn1 C1 38.90(5) . . ? 
C4 Mn1 C1 64.61(6) . . ? 
C3 Mn1 C1 64.47(6) . . ? 
C14 N2 N1 116.51(11) . . ? 
C14 N3 C21 124.86(11) . . ? 
C14 N3 C6 115.72(11) . . ? 
C21 N3 C6 118.72(11) . . ? 
N3 C6 C5 111.17(11) . . ? 
N3 C6 C7 105.68(10) . . ? 
C5 C6 C7 113.73(11) . . ? 
N3 C6 H6A 108.7 . . ? 
C5 C6 H6A 108.7 . . ? 
C7 C6 H6A 108.7 . . ? 
N1 C7 C8 118.20(12) . . ? 
N1 C7 C6 120.24(12) . . ? 
C8 C7 C6 121.53(11) . . ? 
C18 C19 C20 120.05(15) . . ? 
C18 C19 H19A 120.0 . . ? 
C20 C19 H19A 120.0 . . ? 
C16 C15 C20 119.23(13) . . ? 
C16 C15 C14 119.90(13) . . ? 
C20 C15 C14 120.81(12) . . ? 
C13 C8 C9 118.52(13) . . ? 
C13 C8 C7 121.53(13) . . ? 
C9 C8 C7 119.94(13) . . ? 
C7 N1 N2 120.15(12) . . ? 
N3 C21 C22 114.08(12) . . ? 
N3 C21 H21A 108.7 . . ? 
C22 C21 H21A 108.7 . . ? 
N3 C21 H21B 108.7 . . ? 
C22 C21 H21B 108.7 . . ? 
H21A C21 H21B 107.6 . . ? 
O1 C25 Mn1 178.55(15) . . ? 
C18 C17 C16 120.10(13) . . ? 
C18 C17 H17A 120.0 . . ? 
C16 C17 H17A 120.0 . . ? 
C21 C22 H22A 109.5 . . ? 
C21 C22 H22B 109.5 . . ? 
H22A C22 H22B 109.5 . . ? 
C21 C22 H22C 109.5 . . ? 
H22A C22 H22C 109.5 . . ? 
H22B C22 H22C 109.5 . . ? 
C8 C13 C12 120.10(14) . . ? 
C8 C13 H13A 120.0 . . ? 
C12 C13 H13A 120.0 . . ? 
C12 C11 C10 119.34(14) . . ? 
C12 C11 H11A 120.3 . . ? 
C10 C11 H11A 120.3 . . ? 
O3 C24 Mn1 177.58(14) . . ? 
C19 C20 C15 120.45(13) . . ? 
C19 C20 H20A 119.8 . . ? 
C15 C20 H20A 119.8 . . ? 
C2 C1 C5 108.90(13) . . ? 
C2 C1 Mn1 70.64(9) . . ? 
C5 C1 Mn1 70.58(8) . . ? 
C2 C1 H1A 125.5 . . ? 
C5 C1 H1A 125.5 . . ? 
Mn1 C1 H1A 125.5 . . ? 
C17 C16 C15 120.10(14) . . ? 
C17 C16 H16A 120.0 . . ? 
C15 C16 H16A 120.0 . . ? 
C10 C9 C8 120.42(14) . . ? 
C10 C9 H9A 119.8 . . ? 
C8 C9 H9A 119.8 . . ? 
O2 C23 Mn1 178.43(16) . . ? 
C11 C12 C13 120.99(14) . . ? 
C11 C12 H12A 119.5 . . ? 
C13 C12 H12A 119.5 . . ? 
N2 C14 N3 123.29(12) . . ? 
N2 C14 C15 117.03(12) . . ? 
N3 C14 C15 119.64(12) . . ? 
C1 C5 C4 106.70(12) . . ? 
C1 C5 C6 125.17(13) . . ? 
C4 C5 C6 127.79(12) . . ? 
C1 C5 Mn1 70.52(8) . . ? 
C4 C5 Mn1 70.35(8) . . ? 
C6 C5 Mn1 129.24(9) . . ? 
C19 C18 C17 120.05(14) . . ? 
C19 C18 H18A 120.0 . . ? 
C17 C18 H18A 120.0 . . ? 
C4 C3 C2 107.93(14) . . ? 
C4 C3 Mn1 70.59(8) . . ? 
C2 C3 Mn1 70.37(8) . . ? 
C4 C3 H3A 126.0 . . ? 
C2 C3 H3A 126.0 . . ? 
Mn1 C3 H3A 126.0 . . ? 
C11 C10 C9 120.60(14) . . ? 
C11 C10 H10A 119.7 . . ? 
C9 C10 H10A 119.7 . . ? 
C3 C4 C5 108.67(13) . . ? 
C3 C4 Mn1 70.95(8) . . ? 
C5 C4 Mn1 70.80(8) . . ? 
C3 C4 H4A 125.7 . . ? 
C5 C4 H4A 125.7 . . ? 
Mn1 C4 H4A 125.7 . . ? 
C1 C2 C3 107.79(13) . . ? 
C1 C2 Mn1 71.04(8) . . ? 
C3 C2 Mn1 70.75(9) . . ? 
C1 C2 H2A 126.1 . . ? 
C3 C2 H2A 126.1 . . ? 
Mn1 C2 H2A 126.1 . . ? 
  
_diffrn_measured_fraction_theta_max    0.974 
_diffrn_reflns_theta_full              26.00 
_diffrn_measured_fraction_theta_full   0.987 
_refine_diff_density_max    0.462 
_refine_diff_density_min   -0.536 
_refine_diff_density_rms    0.062 
